# Supplementary material
Source: bioRxiv or medRxiv preprint supplement (https://www.biorxiv.org/highwire/filestream/22798/field_highwire_adjunct_files/3/081802-4.pdf)

**Adipose Tissue**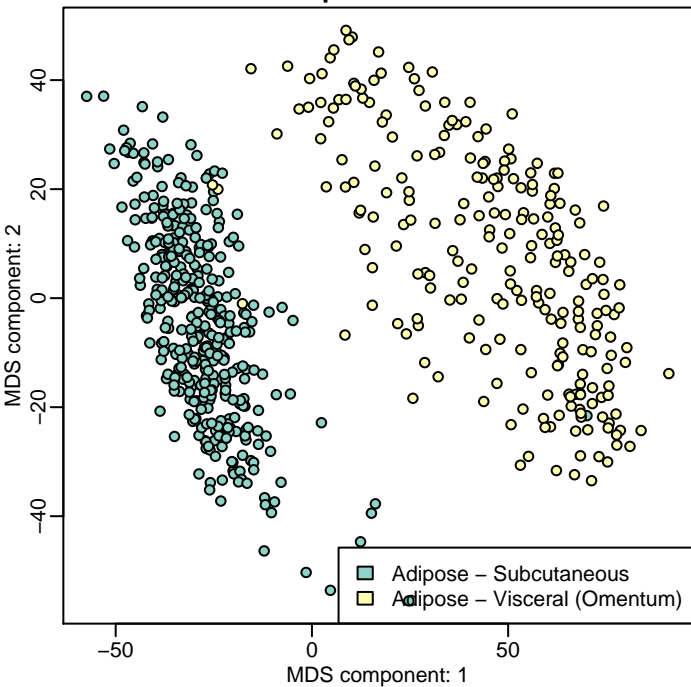**Blood**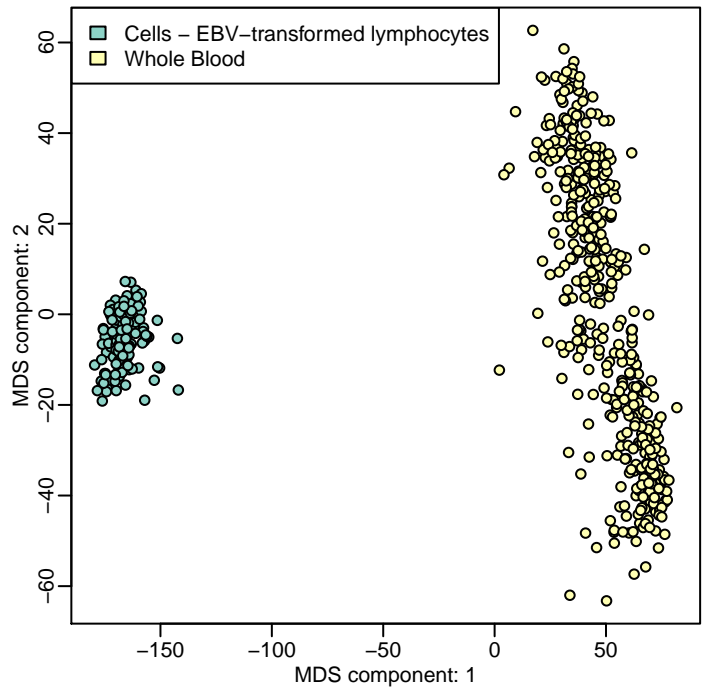**Blood Vessel**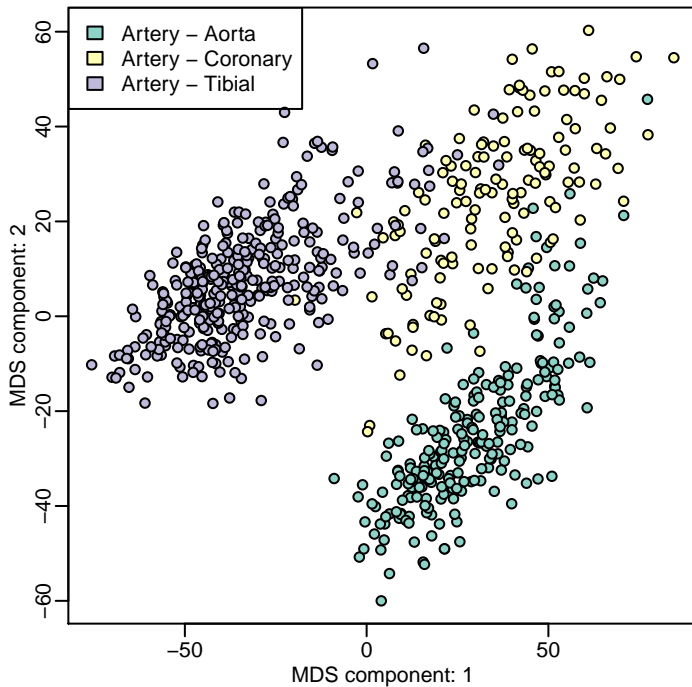**Colon**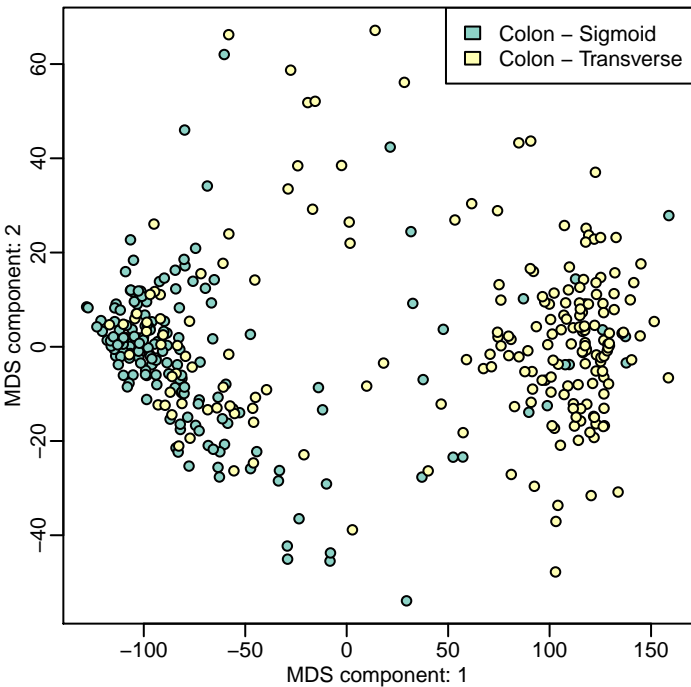**Heart**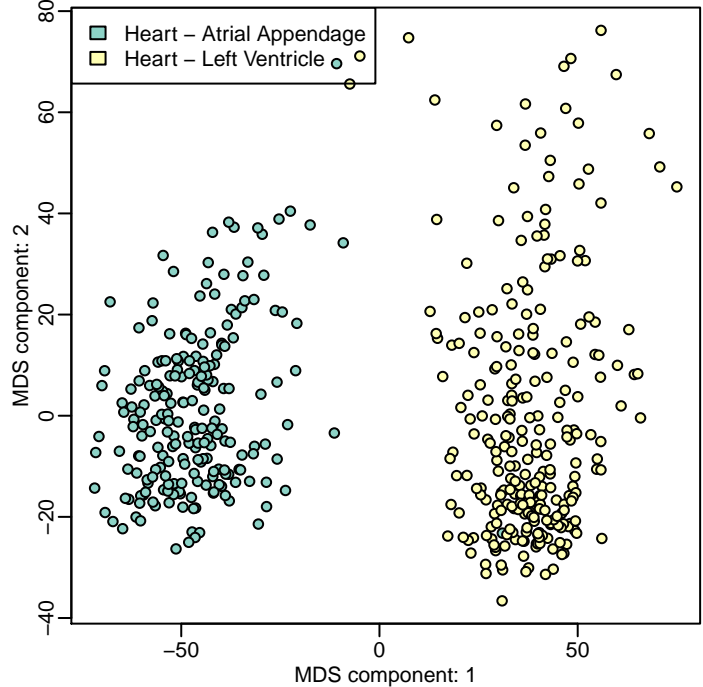**Skin**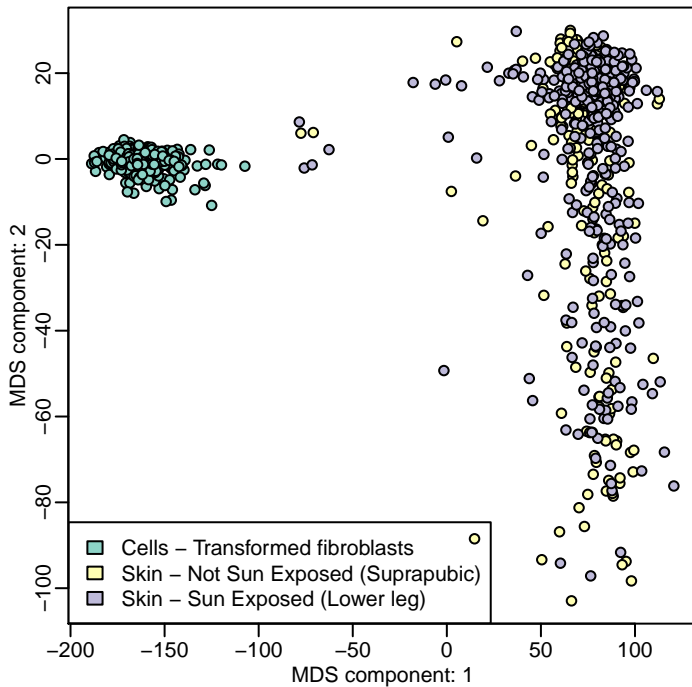**Skin**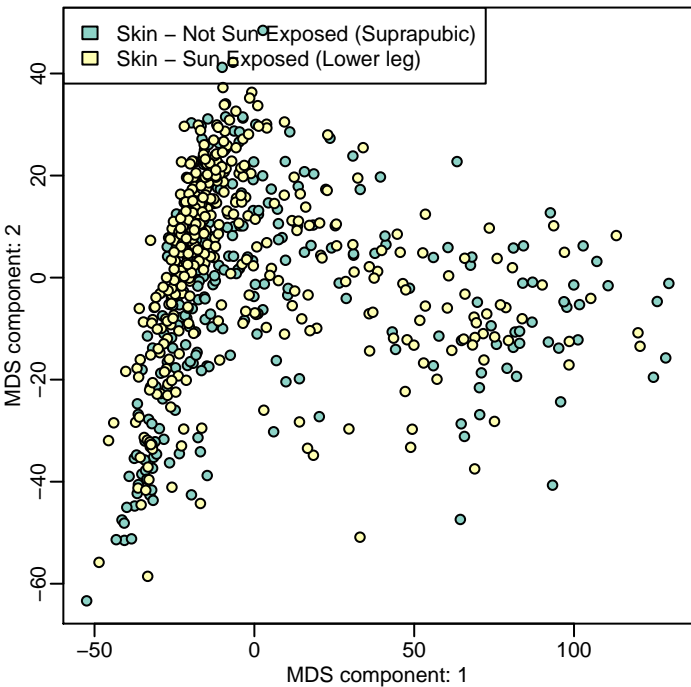**Esophagus**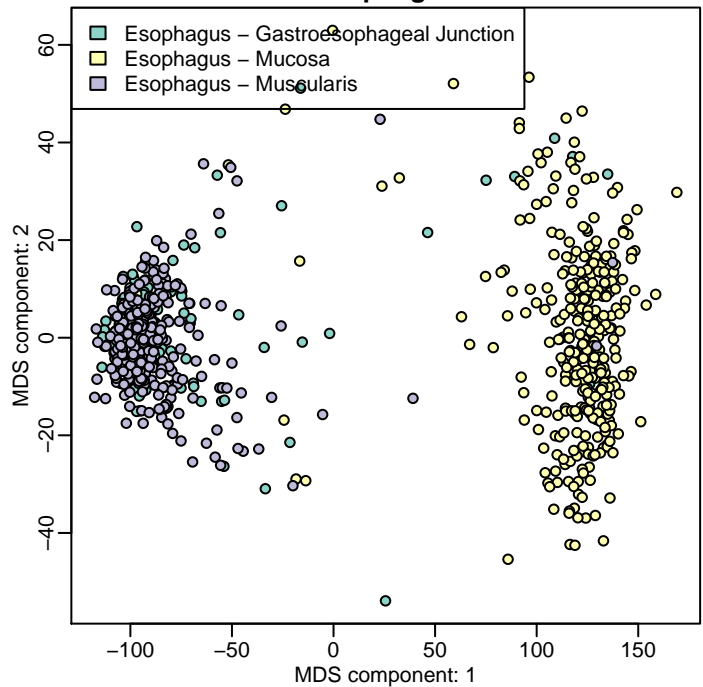**Esophagus**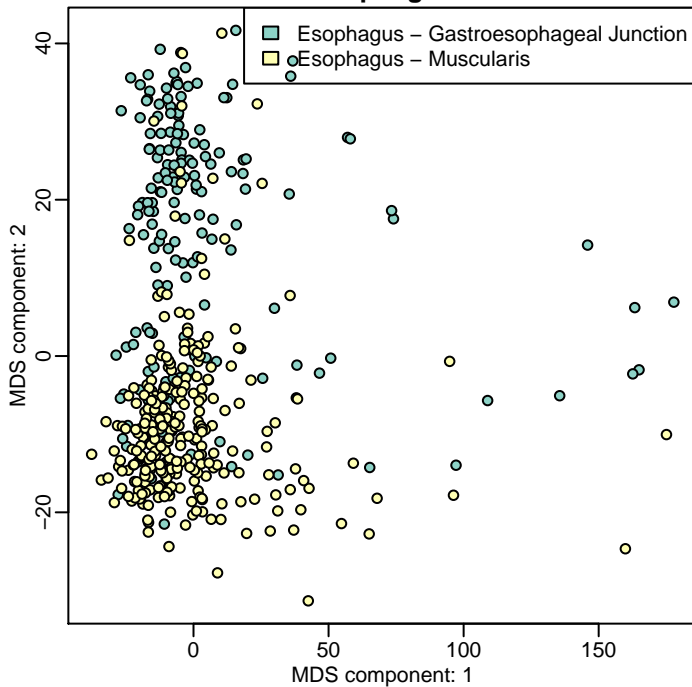**Brain**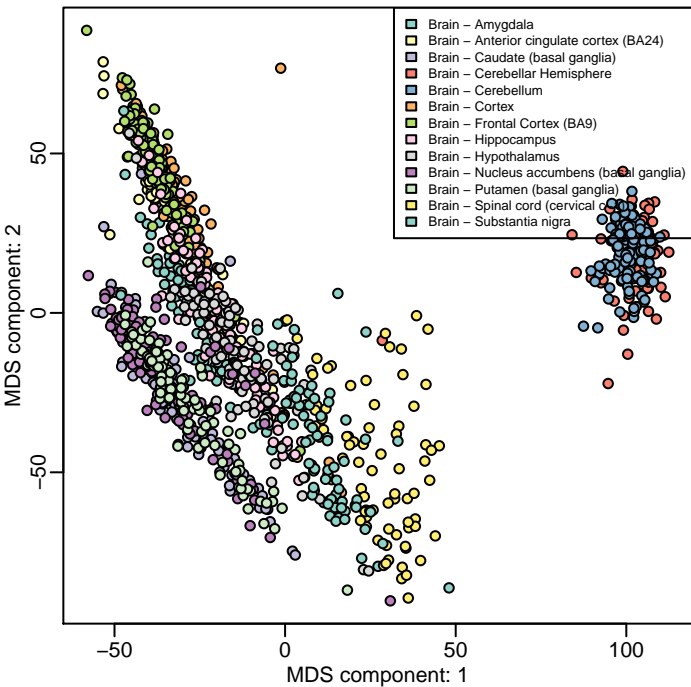**Brain**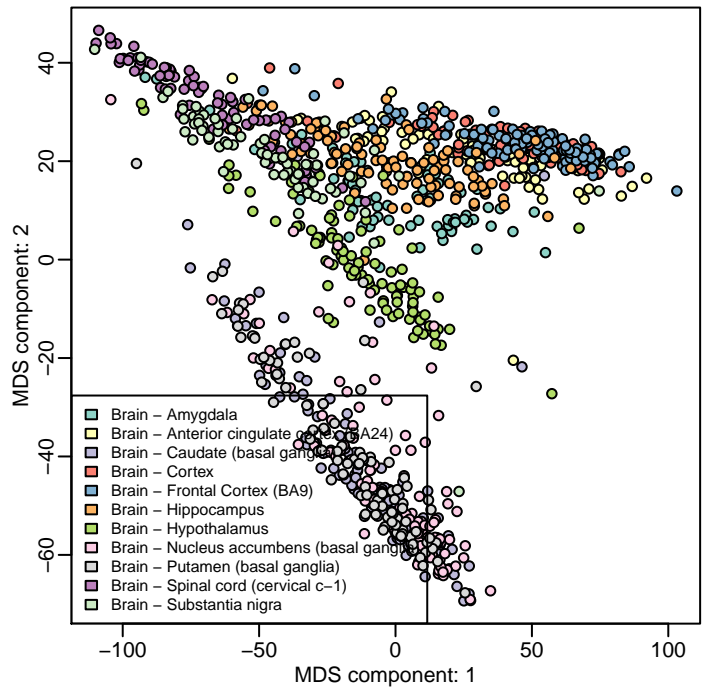**Brain**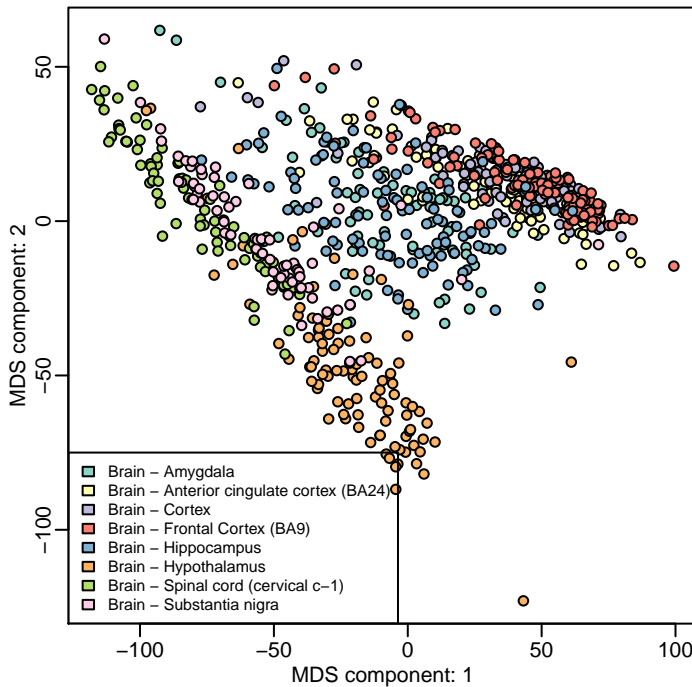

Supplement: Supplementary file [file 081802-4.pdf]
